# Supplementary material for: Products of Sulfide/Selenite Interaction Possess Antioxidant Properties, Scavenge Superoxide-Derived Radicals, React with DNA, and Modulate Blood Pressure and Tension of Isolated Thoracic Aorta
Source: Hindawi journal article supplement (doi:10.1155/2019/9847650), 2019-11-25
Supplement: f1 [file 9847650.f1.pdf]

## SUPPORTING INFORMATION

to

### **Products of sulfide/selenite interaction possess antioxidant properties, scavenge superoxide-derived radicals, react with DNA, modulate blood pressure and tension of isolated thoracic aorta**

Marian Grman<sup>1,\*</sup>, Anton Misak<sup>1,\*</sup>, Lucia Kurakova<sup>2</sup>, Vlasta Brezova<sup>3</sup>, Sona Cacanyiova<sup>4</sup>, Andrea Berenyiova<sup>4</sup>, Peter Balis<sup>4</sup>, Lenka Tomasova<sup>1</sup>, Ammar Kharma<sup>1</sup>, Enrique Domínguez-Álvarez<sup>5</sup>, Miroslav Chovanec<sup>6,†</sup>, Karol Ondrias<sup>1,†</sup>

<sup>1</sup> Institute of Clinical and Translational Research, Biomedical Research Center, Slovak Academy of Sciences, Dubravská cesta 9, 845 05 Bratislava, Slovak Republic

<sup>2</sup> Department of Pharmacology and Toxicology, Faculty of Pharmacy, Comenius University, Odbojarov 10, 832 32 Bratislava, Slovak Republic

<sup>3</sup> Faculty of Chemical and Food Technology, Slovak University of Technology, Radlinského 9, 812 37 Bratislava, Slovak Republic

<sup>4</sup> Institute of Normal and Pathological Physiology, Centre of Experimental Medicine, Slovak Academy of Sciences, Dubravská cesta 9, 841 04 Bratislava, Slovak Republic

<sup>5</sup> Instituto de Química Orgánica General, Consejo Superior de Investigaciones Científicas (IQOG-CSIC), 28006 Madrid, Spain

<sup>6</sup> Cancer Research Institute, Biomedical Research Center, Slovak Academy of Sciences, Dubravská cesta 9, 845 05 Bratislava, Slovak Republic

\* Authors contributed equally to this work.

† Shared senior authorship.

Correspondence should be addressed to Karol Ondrias; [karol.ondrias@savba.sk](mailto:karol.ondrias@savba.sk) and Miroslav Chovanec; [miroslav.chovanec@savba.sk](mailto:miroslav.chovanec@savba.sk)

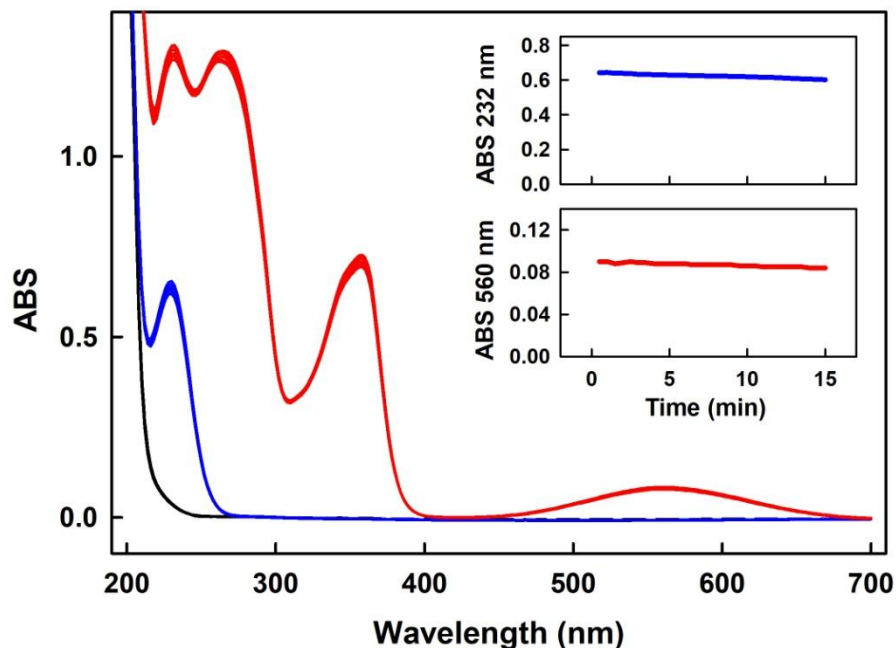

**Supplementary Figure 1: Time-resolved UV-VIS spectra of  $\text{Na}_2\text{SeO}_4$ ,  $\text{H}_2\text{S}$  and their mixture with  $\bullet\text{cPTIO}$ .**

UV-VIS spectra of  $100 \mu\text{mol L}^{-1}$   $\text{Na}_2\text{SeO}_4$  (repeated 3 x 30 s, black), subsequent addition of  $100 \mu\text{mol L}^{-1}$   $\text{H}_2\text{S}$  (30 x 30 s, blue) followed by  $100 \mu\text{mol L}^{-1}$   $\bullet\text{cPTIO}$  (30 x 30 s, red). Upper insert: Kinetic trace of ABS at 232 nm (corresponding to  $\text{HS}^-$ ) in the mixture of  $100 \mu\text{mol L}^{-1}$   $\text{Na}_2\text{SeO}_4$  +  $100 \mu\text{mol L}^{-1}$   $\text{H}_2\text{S}$  (blue). Lower insert: Kinetic trace of  $100 \mu\text{mol L}^{-1}$   $\bullet\text{cPTIO}$  reduction in the mixture of  $100 \mu\text{mol L}^{-1}$   $\text{Na}_2\text{SeO}_4$  +  $100 \mu\text{mol L}^{-1}$   $\text{H}_2\text{S}$  (red) measured as change of ABS at 560 nm. Buffer:  $100 \text{ mmol L}^{-1}$  sodium phosphate buffer,  $100 \mu\text{mol L}^{-1}$  DTPA, pH 7.4 at  $37^\circ\text{C}$ .

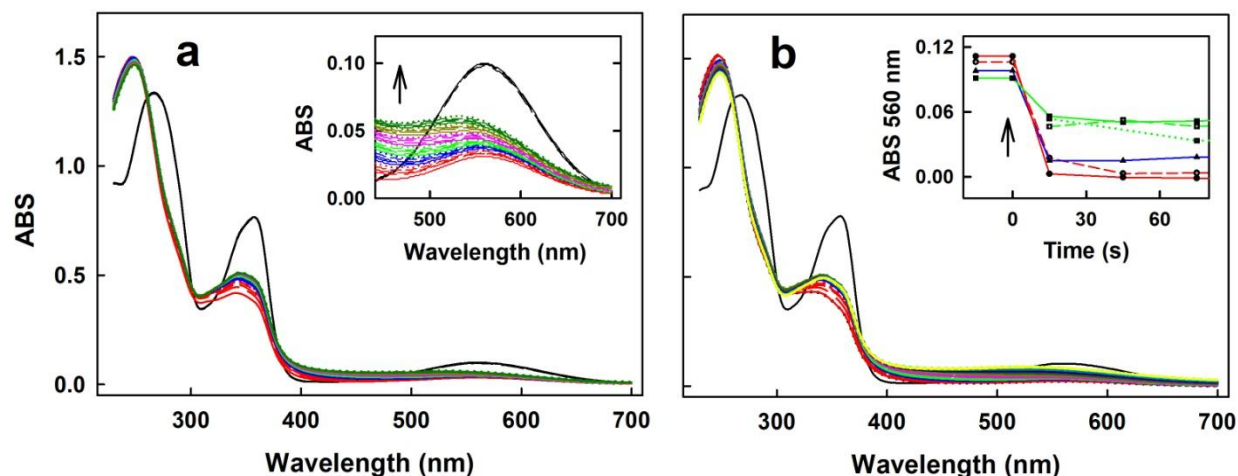

**Supplementary Figure 2: Time resolved UV-VIS spectra of studied compounds.**

(a) Time resolved UV-VIS spectra of  $\bullet$ cPTIO,  $\text{SeCl}_4$  and their mixture with  $\text{H}_2\text{S}$ . UV-VIS spectra of  $100 \mu\text{mol L}^{-1}$   $\bullet$ cPTIO with  $100 \mu\text{mol L}^{-1}$   $\text{SeCl}_4$  (repeated 3 times every 30 s, black). Subsequent addition of  $100 \mu\text{mol L}^{-1}$   $\text{H}_2\text{S}$  measured every 30 s for 15 min. Inset represents detail of ABS at 440-710 nm. The arrow indicates the increase of absorbance at around 420 nm.

(b) Time resolved UV-VIS spectra of the interaction of  $\bullet$ cPTIO/ $\text{SeO}_3^{2-}$  with  $\text{H}_2\text{S}$  in argon de-aerated solutions. UV-VIS spectra of  $100 \mu\text{mol L}^{-1}$   $\bullet$ cPTIO with  $100 \mu\text{mol L}^{-1}$   $\text{SeO}_3^{2-}$  (black) and subsequent addition of  $100 \mu\text{mol L}^{-1}$   $\text{H}_2\text{S}$  (spectra were collected every 30 s for 30 min, the first spectrum, indicated by the red line, was measured in 15<sup>th</sup> second after addition of  $\text{H}_2\text{S}$ ). Inset: The reduction of the  $\bullet$ cPTIO radical was detected as the decrease of ABS at 560 nm. Red lines:  $110 \mu\text{mol L}^{-1}$   $\text{H}_2\text{S}$  was added to  $\bullet$ cPTIO/ $\text{SeO}_3^{2-}$  (110/110 in  $\mu\text{mol L}^{-1}$ ); Blue lines:  $100 \mu\text{mol L}^{-1}$   $\text{H}_2\text{S}$  was added to  $\bullet$ cPTIO/ $\text{SeO}_3^{2-}$  (100/100 in  $\mu\text{mol L}^{-1}$ ) and green lines:  $60 \mu\text{mol L}^{-1}$   $\text{H}_2\text{S}$  was added to  $\bullet$ cPTIO/ $\text{SeO}_3^{2-}$  (100/100 in  $\mu\text{mol L}^{-1}$ ). Arrow marks  $\text{H}_2\text{S}$  addition.

The solid red line of UV-VIS spectra indicates the first spectrum after addition of  $\text{H}_2\text{S}$  into  $\text{SeCl}_4$  or  $\text{SeO}_3^{2-}$ , which is followed each 30 s by: long dash red, medium dash red, short dash red, dotted red, solid blue line, long dash blue, medium dash blue, etc. Buffer:  $100 \text{ mmol L}^{-1}$  sodium phosphate,  $100 \mu\text{mol L}^{-1}$  DTPA, pH 7.4,  $37^\circ\text{C}$ .

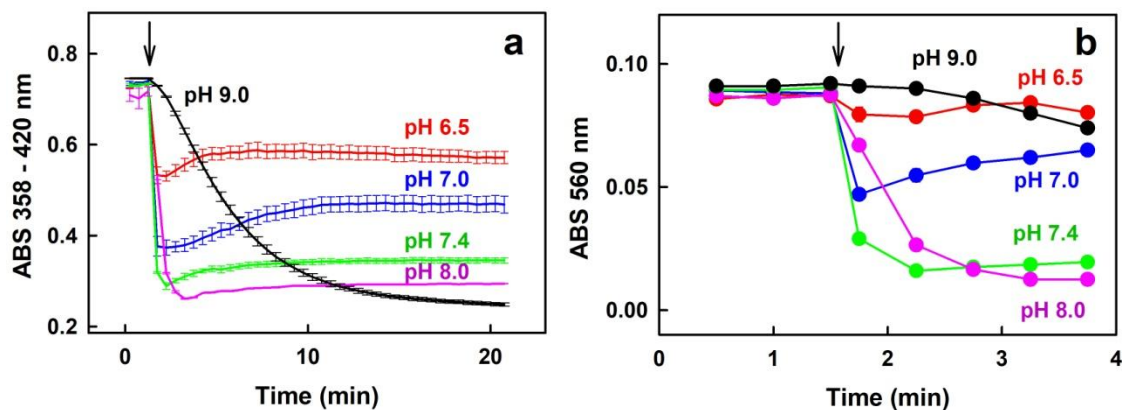

**Supplementary Figure 3: Effect of pH on the kinetics of  $\bullet$ cPTIO reduction induced by  $\text{H}_2\text{S}$  in the presence of  $\text{SeO}_3^{2-}$ .**

The reduction of the  $\bullet$ cPTIO radical was detected as decrease of ABS at 358 nm minus ABS at 420 nm (a) or as a decrease of the absorbance at 560 nm (b). Buffer: 100 mmol  $\text{L}^{-1}$  sodium phosphate, 100  $\mu\text{mol L}^{-1}$  DTPA, pH 6.5, 7.0, 7.4, 8.0, and 9.0 at 37  $^\circ\text{C}$ . Arrow indicates addition of  $\text{H}_2\text{S}$  (100  $\mu\text{mol L}^{-1}$ ) into  $\bullet$ cPTIO/ $\text{SeO}_3^{2-}$  (100/50 in  $\mu\text{mol L}^{-1}$ ) solution. In the case of experiments at pH 6.5 and 7.0, UV-VIS spectra of  $\text{H}_2\text{S}/\text{SeO}_3^{2-}$  were subtracted from the  $\bullet$ cPTIO/ $\text{H}_2\text{S}/\text{SeO}_3^{2-}$  spectra. Values are the means  $\pm$  S.E.M.,  $n = 2-3$ .

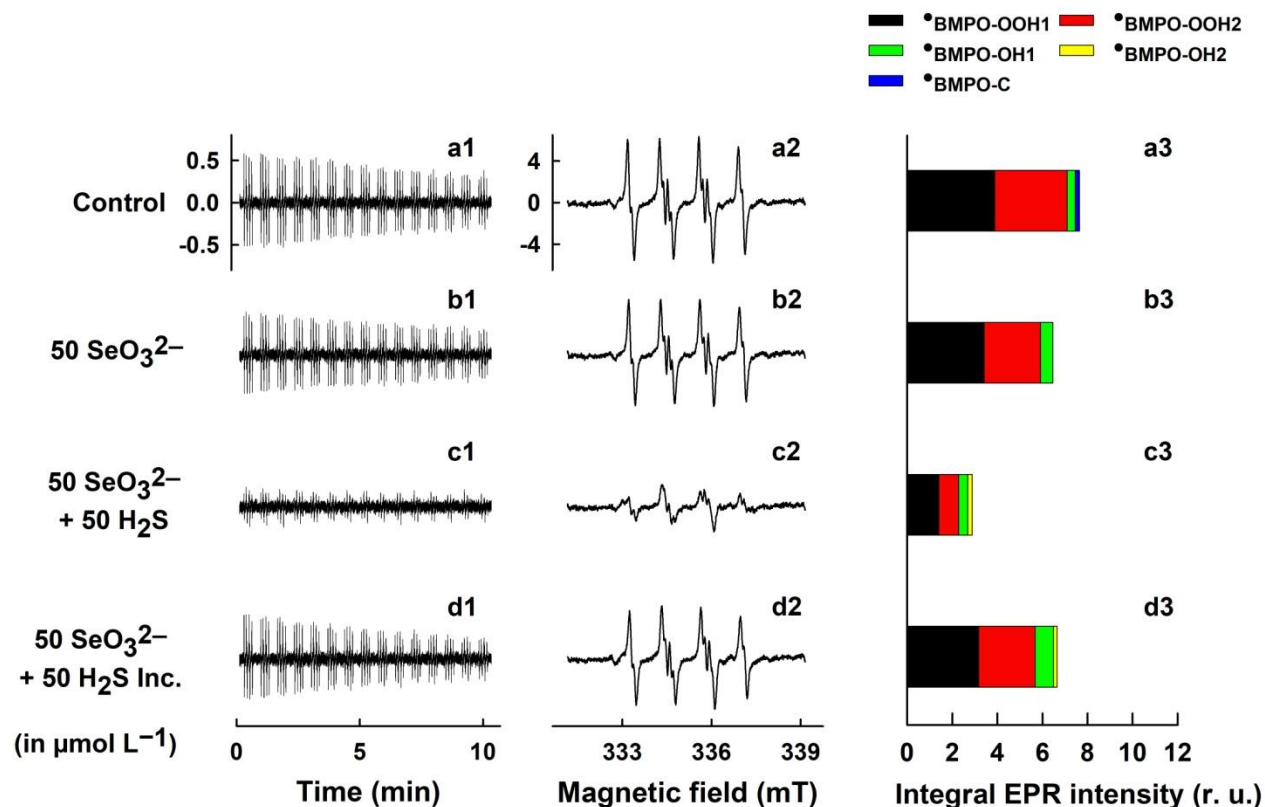

**Supplementary Figure 4: EPR spectra of  $\bullet$ BMPO in the presence of  $\text{O}_2^{\bullet-}$  and modulated by  $\text{H}_2\text{S}/\text{SeO}_3^{2-}$ .**

Representative EPR spectra of the  $\bullet$ BMPO-adducts monitored in 10% v/v saturated  $\text{KO}_2/\text{DMSO}$  solution in  $50 \text{ mmol L}^{-1}$  sodium phosphate buffer,  $0.1 \text{ mmol L}^{-1}$  DTPA, pH 7.4,  $37^\circ\text{C}$  in the presence of studied compounds and  $20 \text{ mmol L}^{-1}$  BMPO. The sets of individual EPR spectra of the  $\bullet$ BMPO-adducts monitored upon 15 sequential scans, each 42 s (a1-d1), starting acquisition 2 min after sample preparation in: control 10% v/v  $\text{KO}_2/\text{DMSO}$  in the buffer (a1),  $\text{KO}_2/\text{DMSO}$  in the presence of  $50 \mu\text{mol L}^{-1}$   $\text{SeO}_3^{2-}$  (b1), 50/50 in  $\mu\text{mol L}^{-1}$   $\text{H}_2\text{S}/\text{SeO}_3^{2-}$  (c1) and 50/50 in  $\mu\text{mol L}^{-1}$   $\text{H}_2\text{S}/\text{SeO}_3^{2-}$  preincubated 5 min before  $\text{KO}_2/\text{DMSO}$  addition (d1). The details of accumulated 15 spectra (a2-d2). The intensities of the time-resolved EPR spectra (a1-d1) and detailed spectra (a2-d2) are comparable, as they were measured at the identical EPR settings. EPR 0.1 mT modulation amplitude was used. (a3-d3) comparison of integral EPR spectra intensities of the individual components of simulated  $\text{BMPO} + \text{O}_2^{\bullet-}$  without (control) and with chalcogen species showed in a1-d1. The first five EPR spectra were accumulated and used for simulation. The data represent the means of  $n = 2$ , standard error was  $\leq 10\%$  of the mean value. The  $\bullet$ BMPO-OOH and  $\bullet$ BMPO-OH were simulated based on two conformers. The means of used hyperfine coupling constants were:  $\bullet$ BMPO-OOH1  $a_N = 13.30 \pm 0.03 \text{ G}$ ;  $a_H = 11.7 \pm 0.1 \text{ G}$ ;  $\bullet$ BMPO-OOH2  $a_N = 13.24 \pm 0.03 \text{ G}$ ;  $a_H = 9.4 \pm 0.1 \text{ G}$ ;  $\bullet$ BMPO-OH1  $a_N = 13.7 \pm 0.3 \text{ G}$ ;  $a_H = 12.3 \pm 0.4 \text{ G}$ ;  $\bullet$ BMPO-OH2  $a_N = 13.6 \pm 0.2 \text{ G}$ ;  $a_H = 15.3 \pm 0.1 \text{ G}$ . For  $\bullet$ BMPO-C  $a_N = 15.2 \pm 0.1 \text{ G}$ ;  $a_H = 21.5 \pm 0.1 \text{ G}$ .

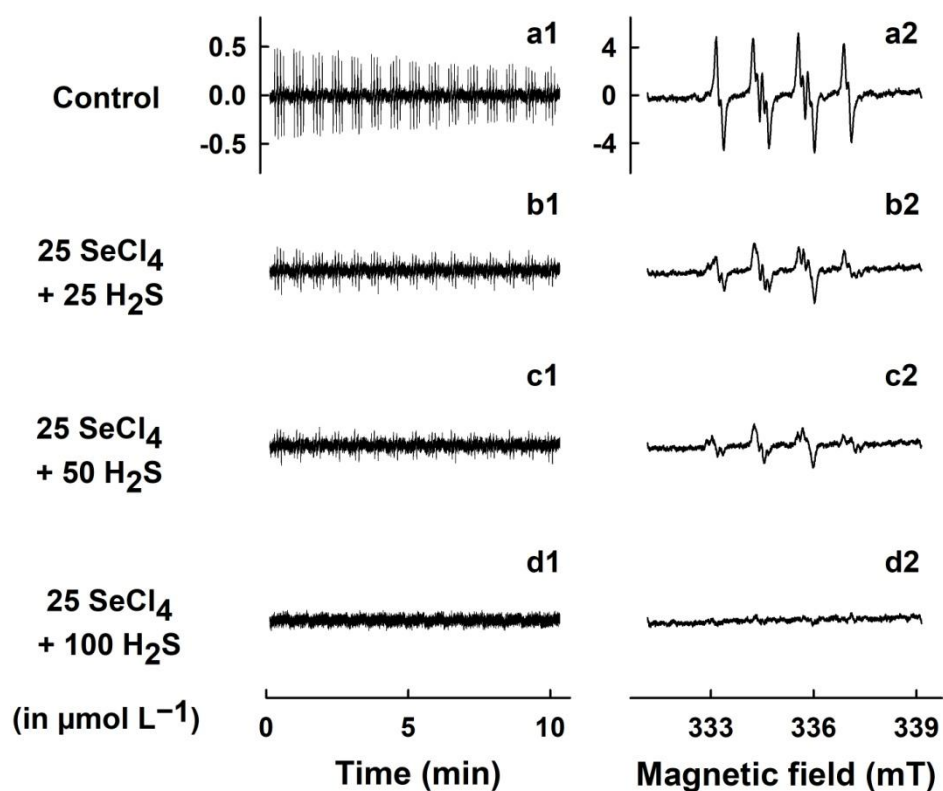

**Supplementary Figure 5: EPR spectra of  $\bullet$ BMPO in the presence of  $\text{O}_2^{\bullet-}$  modulated by  $\text{H}_2\text{S}/\text{SeCl}_4$ .**

Representative EPR spectra of the  $\bullet$ BMPO-adducts monitored in 10% v/v saturated  $\text{KO}_2/\text{DMSO}$  solution in  $50 \text{ mmol L}^{-1}$  sodium phosphate buffer,  $0.1 \text{ mmol L}^{-1}$  DTPA, pH 7.4,  $37^\circ\text{C}$  in the presence of studied compounds and  $20 \text{ mmol L}^{-1}$  BMPO. The sets of individual EPR spectra of the  $\bullet$ BMPO-adducts monitored upon 15 sequential scans, each 42 s (a1-d1), starting acquisition 2 min after sample preparation in: control 10% v/v  $\text{KO}_2/\text{DMSO}$  in the buffer (a1),  $\text{KO}_2/\text{DMSO}$  in the presence of 25/25 in  $\mu\text{mol L}^{-1}$   $\text{H}_2\text{S}/\text{SeCl}_4$  (b1), 50/25 in  $\mu\text{mol L}^{-1}$   $\text{H}_2\text{S}/\text{SeCl}_4$  (c1) and 100/25 in  $\mu\text{mol L}^{-1}$   $\text{H}_2\text{S}/\text{SeCl}_4$  (d1). The detail of accumulated 15 spectra (a2-d2). The intensities of the time-resolved EPR spectra (a1-d1) and detailed spectra (a2-d2) are comparable, as they were measured at the identical EPR settings. EPR modulation amplitude was 0.1 mT.

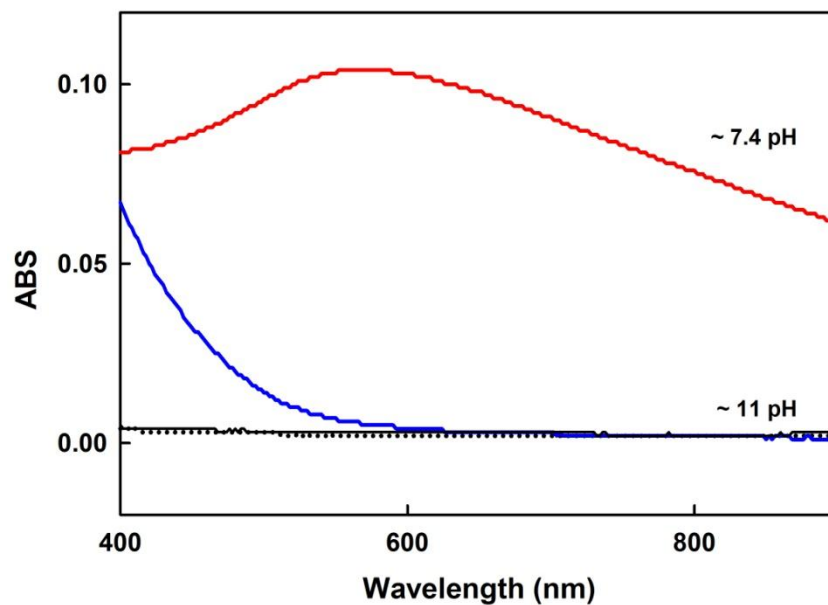

**Supplementary Figure 6: VIS spectra of H<sub>2</sub>S, SeO<sub>3</sub><sup>2-</sup> and their mixture.**

H<sub>2</sub>S (100 μmol L<sup>-1</sup>; black full), SeO<sub>3</sub><sup>2-</sup> (50 μmol L<sup>-1</sup>; dotted black) and their mixture (100/50 in μmol L<sup>-1</sup>) prepared in 0.9 % NaCl pH ~ 11 (blue) and in phosphate buffer of pH ~ 7.4 (red). Sample with phosphate buffer was prepared as follows: 123.5 μL of 100 mmol L<sup>-1</sup> phosphate buffer, 100 μmol L<sup>-1</sup> DTPA, pH 7.4, 37°C; + 14 μL of 1 mol L<sup>-1</sup> HCl; + 62.5 μL of 40 mmol L<sup>-1</sup> SeO<sub>3</sub><sup>2-</sup> prepared in 0.9 % NaCl and + 50 μL of 100 mol L<sup>-1</sup> H<sub>2</sub>S in H<sub>2</sub>O. Final concentrations in the stock mixture of 250 μL volume were 20 mmol L<sup>-1</sup> Na<sub>2</sub>S and 10 mmol L<sup>-1</sup> SeO<sub>3</sub><sup>2-</sup>. pH was measured by paper pH indicator.
